# Supplementary material
Source: PubMed Central journal article supplement (PMC4066483)
Supplement: 1323681111_pnas.201323681SI.pdf [file 1323681111_pnas.201323681SI.pdf]

# Supporting Information

Morgan et al. 10.1073/pnas.1323681111

## SI Text

Previously, a conditional HSD11B1 allele was generated by flanking exon 5 with LoxP sites (1). To generate adipose-specific 11 $\beta$ -hydroxysteroid dehydrogenase type 1 (11 $\beta$ -HSD1) KO mice (FKO), floxed homozygous HSD11B1 mice on a mixed C57 background were crossed with adiponectin-Cre transgenic mice (on a C57BL/6J background, targeting Cre expression to adipocytes). This generated mice devoid of 11 $\beta$ -HSD1 activity in adipose tissue. Genotyping PCR was carried out on ear-clip DNA using gene specific primers (5'-3') P1-GGGAGCTTGCTTACAGCATC, P2-CATTCTCAAGGTAGATTGAACTCTG, and P3-TCCATGCAATCAACTTCTCG. P1+P2 give a 138-bp product for a WT allele and a 172-bp product for an allele containing a 3' LoxP site. P1 and P3 give a 279-bp product for an allele after Cre recombination and exon 5 removal (Fig. S6A). Adipose tissues (gonadal, s.c., and brown) were the only tissues to show re-

combination, with other tissues (liver, muscle, lung, kidney, and heart) remaining normal for conditional HSD11B1 alleles (Fig. S6B). The 11 $\beta$ -HSD1 mRNA was reduced 0.16-fold, 0.17-fold, and 0.2-fold in gonadal, s.c., and brown adipose tissue of FKO mice, respectively; all other tissues studied had 11 $\beta$ -HSD1 mRNA similar to controls (Fig. S6C). The 11 $\beta$ -HSD1 oxo-reductase activity was reduced by 71% and 70% in s.c. and brown adipose tissue explants of FKO mice, respectively. Liver explants had activity similar to that of controls (Fig. S6D). Mature adipocytes extracted from gonadal, s.c., and brown adipose tissue of FKO mice had almost undetectable activity (<98% control activity), whereas the stromal vascular fraction extracted from these depots had activity similar to that of controls (Fig. S6E). Therefore, the 11 $\beta$ -HSD1 expressed in this subadipose tissue fraction is likely to explain the residual activity detected in the adipose tissue explants.

1. Semjonous NM, et al. (2011) Hexose-6-phosphate dehydrogenase contributes to skeletal muscle homeostasis independent of 11 $\beta$ -hydroxysteroid dehydrogenase type

1. *Endocrinology* 152(1):93–102.

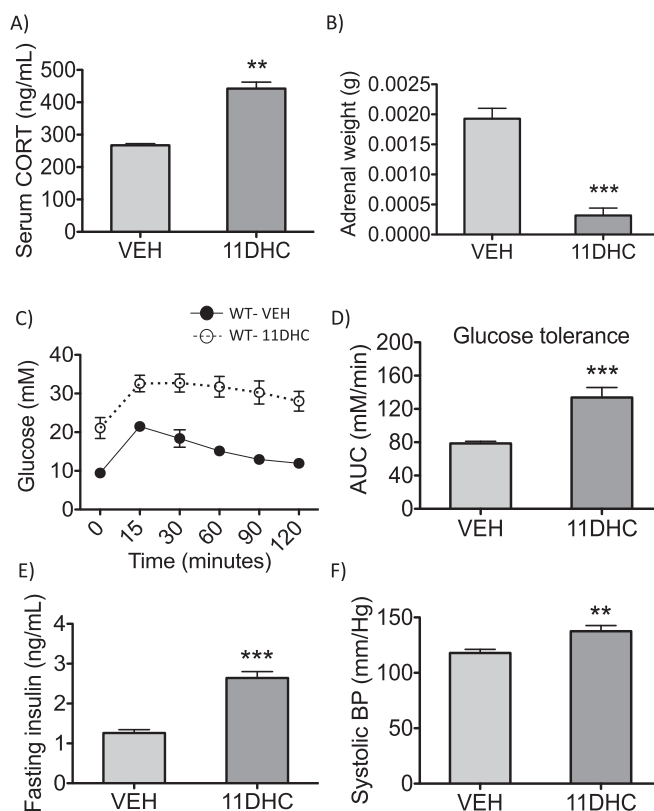

**Fig. S1.** Treatment with 11-dehydrocorticosterone (11DHC) induces glucose intolerance and hypertension in WT mice. C57BL/6 WT mice were treated with 11DHC (100  $\mu$ g/mL) or vehicle via the drinking water for 5 wk ( $n = 7-9$  in each group). Elevated circulating corticosterone (CORT) (A) and suppressed adrenal weights (B) were observed in 11DHC mice, and 11DHC induced glucose intolerance (C and D), increased fasting insulin levels (E), and increased systolic blood pressure (F) compared with vehicle-treated controls. Data were analyzed using two-way ANOVA; see Figs. 1 and 2 for the complete datasets used in the analysis. \*\* $P < 0.01$ , \*\*\* $P < 0.001$  vs. WT vehicle.



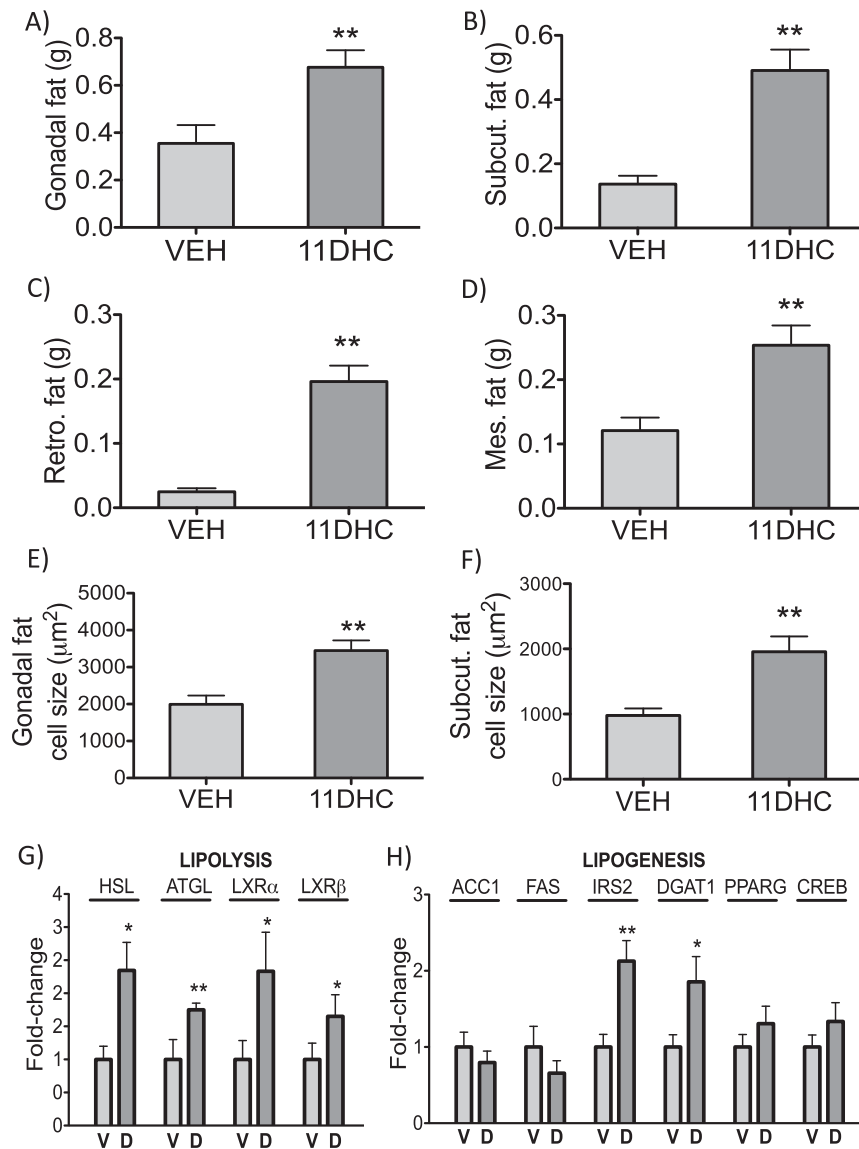

**Fig. S3.** Treatment with 11DHC increases adiposity in WT mice. The 11DHC treatment increased gonadal (A), s.c. (B), retroperitoneal (C), and mesenteric (D) adiposity in WT mice compared with vehicle-treated animals. H&E staining of paraffin-embedded gonadal and s.c. fat sections revealed increased adipocyte size in 11DHC-treated mice (E and F). The 11DHC increased the mRNA expression of key lipolytic genes in gonadal adipose tissue (G) ATGL, adipose triglyceride lipase; HSL, hormone-sensitive lipase; LXR, liver X receptor. The mRNA expression of the lipogenic mediators ACC1, FAS, PPARG, and CREB were unaffected by 11DHC treatment, whereas the expression of IRS2 and DGAT1 was increased (H). Data were analyzed using two-way ANOVA; see Fig. 4 for the complete dataset used in the analysis ( $n = 7-9$  in each group). \* $P < 0.05$ , \*\* $P < 0.01$  vs. WT vehicle. D, 11DHC; V, vehicle.

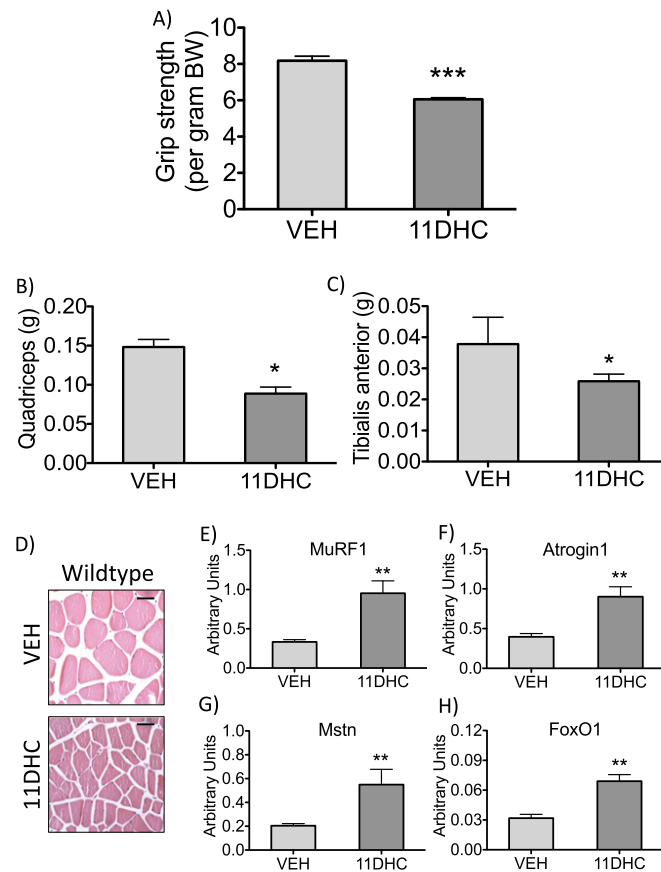

**Fig. 54.** Treatment with 11DHC induces myopathy in WT mice. Grip strength (A), quadriceps muscle bed weights (B), and tibialis anterior muscle bed weights (C) were reduced in 11DHC-treated WT mice. Paraffin-embedded quadriceps muscle sections stained with H&E revealed a smaller myofiber diameter in the 11DHC treatment group (D). (Scale bars, 200  $\mu$ m.) Several muscle atrophy markers including muscle ring finger-1 (MuRF1) (E), atrogin-1 (F), myostatin (G), and forkhead box O1 (FoxO1) (H) were induced following 11DHC treatment. Data were analyzed using two-way ANOVA; see Fig. 5 for the complete dataset used in the analysis ( $n = 7-9$  in each group). \* $P < 0.05$ , \*\* $P < 0.01$ , \*\*\* $P < 0.001$  vs. WT vehicle.

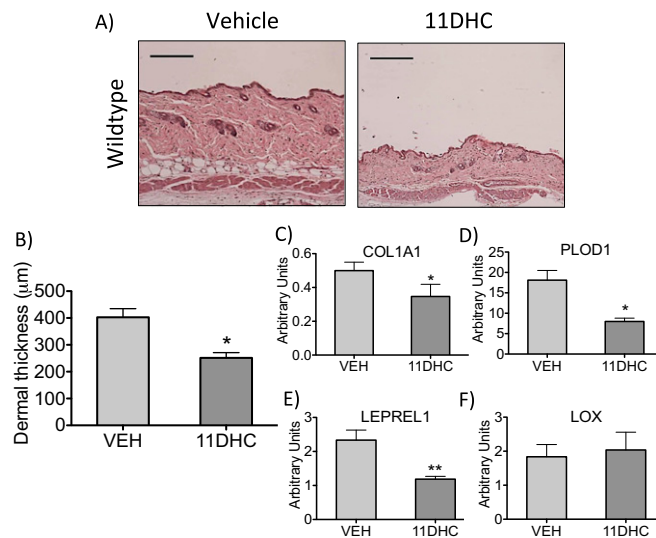

**Fig. 55.** Treatment with 11DHC induces skin thinning in WT mice. Paraffin-embedded skin sections stained with H&E revealed dramatically reduced skin thickness in WT mice following 11DHC treatment (A). (Scale bars, 200  $\mu$ m.) Dermal thickness was quantified using ImageJ software (B). Several genes involved in collagen biosynthesis and processing in skin were induced by 11DHC, including Col1A1 (C), Leprel1 (D), and PLOD1 (E), but not LOX (F). ( $n = 3$  in each group for skin histology and  $n = 7-9$  in each group for gene expression). Data were analyzed using two-way ANOVA; see Fig. 6 for the complete dataset used in the analysis. \* $P < 0.05$ , \*\* $P < 0.01$  vs. WT vehicle.











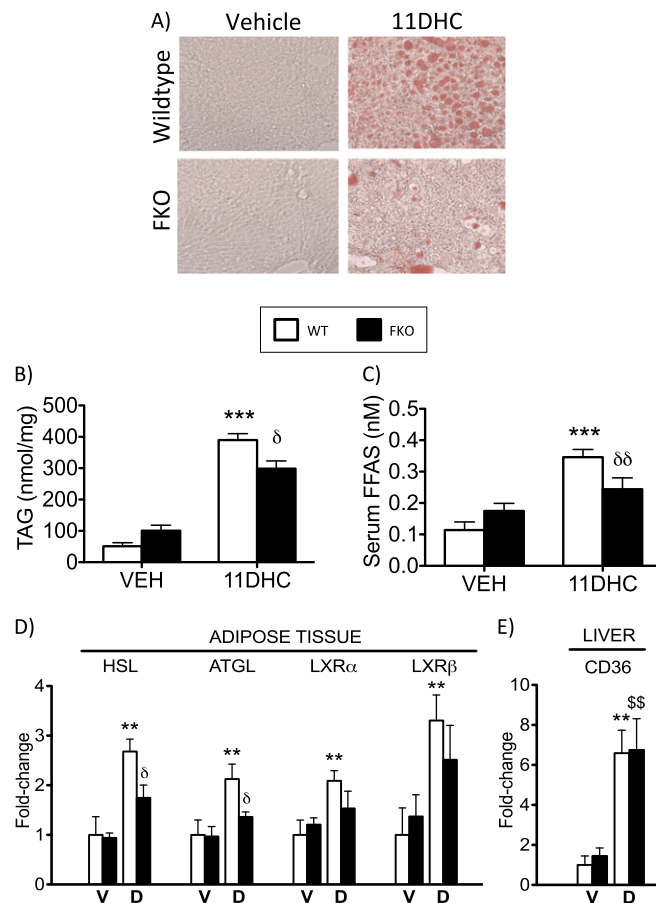

**Fig. S10.** FKO mice are protected from the development of 11DHC-induced hepatic steatosis. Frozen liver sections stained with oil red O (A) and a quantitative TAG assay (B) revealed fat-specific 11 $\beta$ -HSD1 KO (FKO, black bars) mice are protected from hepatic steatosis induced by 11DHC, compared with 11DHC-treated WT controls (white bars). Similarly, FKO mice were shielded from increased serum free fatty acids (C) and increased mRNA expression of lipolytic mediators in adipose tissue (D) following 11DHC treatment. FKO mice were not protected from increased expression of the hepatic free fatty acid transporter CD36 following 11DHC treatment (E). Data were analyzed using two-way ANOVA; see Fig. 7 for the complete dataset used in the analysis ( $n = 6-7$  in each group).  $**P < 0.01$ ,  $***P < 0.001$  vs. WT vehicle;  $^{\delta}P < 0.05$ ,  $^{\delta\delta}P < 0.01$  vs. WT 11DHC. D, 11DHC; V, vehicle.

**Table S1.** Tissue weights from liver-specific 11 $\beta$ -HSD1 KO (LKO) and control mice following treatment with CORT (100  $\mu$ g/mL), 11DHC (100  $\mu$ g/mL), or vehicle via drinking water for 5 wk

| Tissues             | Weight, mg $\pm$ SE |                            |                            |                  |                            |                            |
|---------------------|---------------------|----------------------------|----------------------------|------------------|----------------------------|----------------------------|
|                     | Control             |                            |                            | LKO              |                            |                            |
|                     | Vehicle             | CORT                       | 11DHC                      | Vehicle          | CORT                       | 11DHC                      |
| Body weight, g      | 23.69 $\pm$ 1.88    | 22.90 $\pm$ 1.10           | 22.61 $\pm$ 0.89           | 24.50 $\pm$ 0.87 | 23.85 $\pm$ 1.24           | 24.13 $\pm$ 1.46           |
| Quadriceps          | 152 $\pm$ 12        | 79 $\pm$ 15*               | 108 $\pm$ 2 <sup>†</sup>   | 214 $\pm$ 49     | 131 $\pm$ 29 <sup>§</sup>  | 127 $\pm$ 8 <sup>§</sup>   |
| Tibialis anterior   | 48 $\pm$ 3          | 31 $\pm$ 4 <sup>†</sup>    | 38 $\pm$ 5                 | 48 $\pm$ 3       | 39 $\pm$ 4                 | 37 $\pm$ 2 <sup>§</sup>    |
| Soleus              | 6.8 $\pm$ 0.6       | 6.7 $\pm$ 1                | 5.7 $\pm$ 0.5              | 7.1 $\pm$ 0.2    | 5.1 $\pm$ 0.8              | 6.0 $\pm$ 0.3              |
| Gonadal fat         | 264 $\pm$ 38        | 621 $\pm$ 98*              | 377 $\pm$ 68 <sup>†</sup>  | 244 $\pm$ 13     | 442 $\pm$ 74 <sup>§</sup>  | 373 $\pm$ 102 <sup>§</sup> |
| Mesenteric fat      | 55 $\pm$ 10         | 321 $\pm$ 46 <sup>†</sup>  | 217 $\pm$ 35 <sup>†</sup>  | 53 $\pm$ 11      | 347 $\pm$ 34 <sup>¶</sup>  | 363 $\pm$ 42 <sup>¶</sup>  |
| Retroperitoneal fat | 73 $\pm$ 29         | 232 $\pm$ 47*              | 146 $\pm$ 35 <sup>†</sup>  | 71 $\pm$ 11      | 165 $\pm$ 37 <sup>  </sup> | 166 $\pm$ 60 <sup>§</sup>  |
| Subcutaneous fat    | 245 $\pm$ 36        | 688 $\pm$ 104*             | 442 $\pm$ 43*              | 226 $\pm$ 31     | 528 $\pm$ 84 <sup>  </sup> | 371 $\pm$ 107 <sup>§</sup> |
| Adrenal gland       | 1.4 $\pm$ 0.2       | 0.4 $\pm$ 0.1 <sup>†</sup> | 0.4 $\pm$ 0.1 <sup>†</sup> | 1.7 $\pm$ 0.1    | 0.4 $\pm$ 0.1 <sup>¶</sup> | 0.3 $\pm$ 0.1 <sup>¶</sup> |
| Liver               | 1,088 $\pm$ 69      | 1,172 $\pm$ 67             | 1,055 $\pm$ 20             | 1,076 $\pm$ 77   | 1,182 $\pm$ 132            | 1,041 $\pm$ 52             |
| Kidney              | 174 $\pm$ 10        | 153 $\pm$ 6                | 136 $\pm$ 6                | 167 $\pm$ 6      | 170 $\pm$ 8                | 169 $\pm$ 20               |

Data were analyzed using two-way ANOVA ( $n = 6-7$  in each group). <sup>†</sup> $P < 0.05$ , \* $P < 0.01$  <sup>†</sup> $P < 0.001$  vs. WT vehicle; <sup>§</sup> $P < 0.05$ , <sup>||</sup> $P < 0.01$ , <sup>¶</sup> $P < 0.01$  vs. LKO vehicle.

**Table S2. Tissue weights from adipose-specific 11 $\beta$ -HSD1 KO mice (FKO) and control mice following treatment with CORT (100  $\mu$ g/mL), 11DHC (100  $\mu$ g/mL), or vehicle via drinking water for 5 wk**

| Tissues             | Weight, mg $\pm$ SE |                            |                            |                  |                            |                            |
|---------------------|---------------------|----------------------------|----------------------------|------------------|----------------------------|----------------------------|
|                     | Control             |                            |                            | FKO              |                            |                            |
|                     | Vehicle             | CORT                       | 11DHC                      | Vehicle          | CORT                       | 11DHC                      |
| Body weight, g      | 27.74 $\pm$ 0.53    | 29.69 $\pm$ 0.39           | 27.26 $\pm$ 1.42           | 27.75 $\pm$ 0.48 | 29.73 $\pm$ 0.55           | 29.44 $\pm$ 0.67           |
| Quadriceps          | 170 $\pm$ 8         | 99 $\pm$ 12*               | 123 $\pm$ 5*               | 172 $\pm$ 11     | 116 $\pm$ 6 <sup>‡</sup>   | 118 $\pm$ 14 <sup>‡</sup>  |
| Tibialis anterior   | 58 $\pm$ 0.0031     | 34 $\pm$ 2.9*              | 29 $\pm$ 3.3*              | 50 $\pm$ 1.6     | 32 $\pm$ 3.7 <sup>‡</sup>  | 38 $\pm$ 5.6 <sup>§</sup>  |
| Soleus              | 7.9 $\pm$ 0.5       | 9.7 $\pm$ 1.2              | 6.1 $\pm$ 0.5              | 10.6 $\pm$ 1.6   | 5.8 $\pm$ 1.1              | 6.6 $\pm$ 0.3              |
| Gonadal fat         | 345 $\pm$ 29        | 946 $\pm$ 114*             | 830 $\pm$ 26 <sup>†</sup>  | 360 $\pm$ 21     | 802 $\pm$ 79 <sup>‡</sup>  | 827 $\pm$ 84 <sup>‡</sup>  |
| Mesenteric fat      | 88 $\pm$ 24         | 240 $\pm$ 43               | 335 $\pm$ 88               | 68 $\pm$ 9       | 210 $\pm$ 13               | 269 $\pm$ 28               |
| Retroperitoneal fat | 86 $\pm$ 16         | 319 $\pm$ 45*              | 390 $\pm$ 50*              | 84 $\pm$ 10      | 306 $\pm$ 27 <sup>‡</sup>  | 367 $\pm$ 21 <sup>‡</sup>  |
| Subcutaneous fat    | 230 $\pm$ 28        | 987 $\pm$ 58 <sup>†</sup>  | 1111 $\pm$ 54 <sup>†</sup> | 186 $\pm$ 22     | 976 $\pm$ 77 <sup>¶</sup>  | 913 $\pm$ 195 <sup>‡</sup> |
| Adrenal gland       | 1.8 $\pm$ 0.1       | 0.7 $\pm$ 0.1 <sup>†</sup> | 0.6 $\pm$ 0.2 <sup>†</sup> | 1.6 $\pm$ 0.1    | 0.5 $\pm$ 0.1 <sup>¶</sup> | 0.5 $\pm$ 0.2 <sup>¶</sup> |
| Liver               | 1,060 $\pm$ 40      | 1,648 $\pm$ 189            | 1,098 $\pm$ 67             | 1,107 $\pm$ 115  | 1,243 $\pm$ 58             | 1,072 $\pm$ 105            |
| Kidney              | 170 $\pm$ 7         | 160 $\pm$ 8                | 153 $\pm$ 1                | 157 $\pm$ 5      | 175 $\pm$ 32               | 173 $\pm$ 9                |

Data were analyzed using two-way ANOVA ( $n = 6-7$  in each group). \* $P < 0.01$  <sup>†</sup> $P < 0.001$  vs. WT vehicle; <sup>§</sup> $P < 0.05$ , <sup>‡</sup> $P < 0.01$ , <sup>¶</sup> $P < 0.01$  vs. FKO vehicle.
